# Supplementary material
Source: ML conference proceedings conference paper supplement (https://aclanthology.org/K19-1075)
Supplement: Attachment [file GDHA_appendix.pdf › GDHA_appendix.pdf]

# Appendix: Goal-Embedded Dual Hierarchical Model for Task-Oriented Dialogue Generation

**Yi-An Lai**  
Amazon ML  
Seattle  
yianl@amazon.com

**Arshit Gupta**  
Amazon ML  
Seattle  
arshig@amazon.com

**Yi Zhang**  
Amazon ML  
Seattle  
yizhngn@amazon.com

## A More Generated Dialogues for Qualitative Comparison

In Table 1 and Table 2, we list and compare more generated dialogues of different models given a variable number of goals to focus on.

The domains, what slots to request such as

phone or postcode, and when should the user make a reservation or not are specified in goals. We use bold style to emphasize whether the assigned goals are achieved or missed such as requests of a correct slot or a wrong domain. The underline and bold style denotes the role confusions.

| Goals                                                                                                 | LM + Goal                                                                                                                                                                                                                                                                                                                                                                                                                                                                                                                                                                                                                                                                                                                                                                                                                                            | HRED                                                                                                                                                                                                                                                                                                                                                                                                                                                                                                                                                                                                                                                                                                                                                                                                                                                                                                                                                                  | G-DuHA                                                                                                                                                                                                                                                                                                                                                                                                                                                                                                                                                                                                                                                                                                                                                                                                                                                    |
|-------------------------------------------------------------------------------------------------------|------------------------------------------------------------------------------------------------------------------------------------------------------------------------------------------------------------------------------------------------------------------------------------------------------------------------------------------------------------------------------------------------------------------------------------------------------------------------------------------------------------------------------------------------------------------------------------------------------------------------------------------------------------------------------------------------------------------------------------------------------------------------------------------------------------------------------------------------------|-----------------------------------------------------------------------------------------------------------------------------------------------------------------------------------------------------------------------------------------------------------------------------------------------------------------------------------------------------------------------------------------------------------------------------------------------------------------------------------------------------------------------------------------------------------------------------------------------------------------------------------------------------------------------------------------------------------------------------------------------------------------------------------------------------------------------------------------------------------------------------------------------------------------------------------------------------------------------|-----------------------------------------------------------------------------------------------------------------------------------------------------------------------------------------------------------------------------------------------------------------------------------------------------------------------------------------------------------------------------------------------------------------------------------------------------------------------------------------------------------------------------------------------------------------------------------------------------------------------------------------------------------------------------------------------------------------------------------------------------------------------------------------------------------------------------------------------------------|
| Domain: <b>hotel</b><br>User: [name]<br>Reqt: []<br><b>Book: True</b>                                 | U: i am looking for a hotel called the [hotel_name] .<br>S: [hotel_name] is a [value.pricerange] -ly priced guesthouse in the [value.area] . would you like me to book a room for you ?<br>U: yes , please . i need [value.count] for [value.count] people and [value.count] nights starting from [value.day] .<br>S: <b>i have booked you at the [hotel_name]</b> . your reference number is [hotel.reference] . is there anything else i can help you with ?<br>U: no , that s all . thank you .<br>S: you are welcome . have a great day !                                                                                                                                                                                                                                                                                                        | U: i am looking for a hotel called the [hotel_name] .<br>S: [hotel_name] is a guesthouse in the [value.area] . it is [value.pricerange] -ly priced and has [value.count] stars . would you like to book a room ?<br>U: yes , please . i need a room for [value.count] people for [value.count] nights starting on [value.day] .<br>S: i am sorry , but i was unable to book that for you . would you like to try a different day or a shorter stay ?<br>U: how about [value.count] nights ?<br>S: <b>i was able to book you at the [hotel_name]</b> . your reference number is [hotel.reference] . is there anything else i can help you with ?<br>U: <b>i am also looking for a train</b> that leaves after [value.time] on [value.day] .<br>... (Cut Off) → <b>Off the Rails</b>                                                                                                                                                                                    | U: i am looking for a hotel called the [hotel_name] .<br>S: [hotel_name] is a guesthouse in the [value.area] area . would you like to book a room ?<br>U: yes , i would like to book it for [value.count] people and [value.count] nights starting from [value.day] .<br>S: <b>booking was successful</b> . reference number is [hotel.reference] .<br>U: that s all i need . thank you .<br>S: you are welcome . have a great day !                                                                                                                                                                                                                                                                                                                                                                                                                      |
| Domain: attraction<br>User: [name]<br>Reqt: [phone, type]<br>Book: False                              | U: i am looking for information about [attraction_name]<br>S: [attraction_name] is a nightclub in the [value.area] of town . their <b>phone number is [attraction.phone]</b> .<br>U: <b>i help you with anything else ?</b><br>S: yes , i am also looking for a train that [value.place] to [value.place] .<br>U: what day and time would you like to leave ?<br>S: i would like to leave on [value.day] and arrive by [value.time] .<br>U: i have [value.count] trains that that day . [value.time] . would you like me to book it for you ?<br>S: yes , please . <b>i need the price</b> and train id .<br>U: the train is [value.price] pounds . the price is [value.price] pounds .<br>S: you like me to <b>book that for you ?</b><br>U: <b>no</b> , that s all i need . thank you .<br>S: thank you for using our service . have a great day . | U: i am looking for information about [attraction_name]<br>S: [attraction_name] is located in the [value.area] of town at [attraction.address] .<br>U: what is the entrance fee ?<br>S: i am sorry , i do not have that information .<br>U: i am also looking for a train that leaves after [value.time] on [value.day] .<br>S: i have [value.count] trains that meet your criteria . would you like to narrow it down by departure site , destination , or arrival time ?<br>U: i would like to leave on [value.day] and arrive by [value.time] .<br>S: i have train [train.id] that leaves at [value.time] and arrives at [value.time] . would you like me to book that for you ?<br>U: <b>yes , please book it for</b> [value.count] people .<br>S: booking was successful , the total fee is [value.price] gbp payable at the station . reference number is [train.reference] .<br>U: thank you . that is all i need .<br>S: you are welcome . have a great day ! | U: i am looking for information about [attraction_name]<br>S: [attraction_name] is a museum in the [value.area] area . would you like the phone number ?<br>U: yes , i would like the postcode and phone number .<br>S: their <b>phone number is [attraction.phone]</b> and the postcode is [attraction.postcode] .<br>U: i also need a train to [value.place] .<br>S: where will you be departing from ?<br>U: i will be leaving from [value.place] on [value.day] .<br>S: i have [value.count] trains that meet your criteria . what time would you like to arrive by ?<br>U: i need to arrive by [value.time] .<br>S: i have train [train.id] that leaves at [value.time] and arrives at [value.time] . would you like me to <b>book that for you ?</b><br>U: <b>no</b> , that s all i needed . thank you .<br>S: you are welcome . have a great day ! |
| Domain: train<br>User: [arriveBy, day, departure, destination]<br>Reqt: [price]<br><b>Book: False</b> |                                                                                                                                                                                                                                                                                                                                                                                                                                                                                                                                                                                                                                                                                                                                                                                                                                                      |                                                                                                                                                                                                                                                                                                                                                                                                                                                                                                                                                                                                                                                                                                                                                                                                                                                                                                                                                                       |                                                                                                                                                                                                                                                                                                                                                                                                                                                                                                                                                                                                                                                                                                                                                                                                                                                           |

Table 1: Dialogue qualitative comparison. Reqt: Requests. U: User, S: System. **Goal hit or miss.** Role confusion.

| Goals                                                                                                                                                                                                                                                                | LM + Goal                                                                                                                                                                                                                                                                                                                                                                                                                                                                                                                                                                                                                                                                                                                                                                                                                                                                                                                                                                                                                                              | HRED                                                                                                                                                                                                                                                                                                                                                                                                                                                                                                                                                                                                                                                                                                                                                                                                                                                                                                                                                                                                                                                                                                                  | G-DuHA                                                                                                                                                                                                                                                                                                                                                                                                                                                                                                                                                                                                                                                                                                                                                                                                                                                                                                                                                                                                                                                                                                                          |
|----------------------------------------------------------------------------------------------------------------------------------------------------------------------------------------------------------------------------------------------------------------------|--------------------------------------------------------------------------------------------------------------------------------------------------------------------------------------------------------------------------------------------------------------------------------------------------------------------------------------------------------------------------------------------------------------------------------------------------------------------------------------------------------------------------------------------------------------------------------------------------------------------------------------------------------------------------------------------------------------------------------------------------------------------------------------------------------------------------------------------------------------------------------------------------------------------------------------------------------------------------------------------------------------------------------------------------------|-----------------------------------------------------------------------------------------------------------------------------------------------------------------------------------------------------------------------------------------------------------------------------------------------------------------------------------------------------------------------------------------------------------------------------------------------------------------------------------------------------------------------------------------------------------------------------------------------------------------------------------------------------------------------------------------------------------------------------------------------------------------------------------------------------------------------------------------------------------------------------------------------------------------------------------------------------------------------------------------------------------------------------------------------------------------------------------------------------------------------|---------------------------------------------------------------------------------------------------------------------------------------------------------------------------------------------------------------------------------------------------------------------------------------------------------------------------------------------------------------------------------------------------------------------------------------------------------------------------------------------------------------------------------------------------------------------------------------------------------------------------------------------------------------------------------------------------------------------------------------------------------------------------------------------------------------------------------------------------------------------------------------------------------------------------------------------------------------------------------------------------------------------------------------------------------------------------------------------------------------------------------|
| Domain: attraction<br>User: [name]<br>Req: [address, entrance fee]<br>Book: False<br><br>Domain: <b>hotel</b><br>User: [name]<br>Req: [postcode, stars]<br>Book: <b>False</b><br><br>Domain: <b>taxi</b><br>User: [leaveAt]<br>Req: [car type, phone]<br>Book: False | U: i am looking for [attraction.name] in [value.place]<br>S: it is located in the [value.area] area . it is located on [attraction.address] .<br><b>U: is free .</b><br><b>S: can i get the phone number ?</b><br>U: the , the phone number is [attraction.phone] .<br>S: i you . <b>i am also looking for a hotel called [hotel.name] .</b><br>U: [hotel.name] is a [value.pricerange] hotel in the [value.area] area . it is a [value.count] star rating . would you like me to <b>book a room for you ?</b><br><b>S: no , i just need the information .</b><br>U: you are welcome . is there anything else i can help you with today ?<br><b>S: i also need a taxi</b> to commute between the [value.count] place -s .<br>U: what time would you like to leave ?<br>S: i would like to leave the hotel by [value.time] .<br>U: i have booked a taxi for you . the contact number is [taxi.phone] . is there anything else i can help you with ?<br>S: no , that s all i need . thank you for your help !<br>U: you are welcome . have a great day ! | U: i am looking for [attraction.name] in [value.place]<br>S: i have found [attraction.name] , it s located in the [value.area] . it is free to enter . would you like more information ?<br>U: yes , can i get the phone number and postcode ?<br>S: sure , the phone number is [attraction.phone] and the postcode is [attraction.postcode] .<br><b>U: i am also looking for a train</b> that leaves on [value.day] and goes to [value.place] .<br>S: there are [value.count] trains that match your request . what time would you like to leave ?<br>U: i would like to leave after [value.time] .<br>S: i have train [train.id] that leaves at [value.time] and arrives at [value.time] . would you like me to book that for you ?<br>U: yes , please book it for [value.count] people .<br>S: booking was successful , the total fee is [value.price] gbp payable at the station . reference number is [train.reference] .<br>U: thank you so much for your help .<br>S: you are welcome . have a great day !<br>U: thank you , you too .<br>S: thank you for using our service today !<br>→ <b>Off the Rails</b> | U: i am looking for [attraction.name] in [value.place]<br>S: it is located at [attraction.address] . is there anything else you would like to know ?<br>U: what is the postcode ?<br>S: [hotel.postcode] . is there anything else i can help you with ?<br><b>U: i am also looking for a hotel called [hotel.name] .</b><br>S: [hotel.name] is a [value.pricerange] -ly priced guesthouse in the [value.area] area . would you like me to <b>book you a room ?</b><br><b>U: no , i just need the address please .</b><br>S: the postcode is [hotel.postcode] . is there anything else i can help you with ?<br><b>U: i also need a taxi</b> to get between the [value.count] place -s .<br>S: i can help you with that . what time would you like to leave or arrive by ?<br>U: i want to leave the hotel by [value.time] .<br>S: i have booked you a [taxi.type] , the contact number is [taxi.phone] .<br>U: thank you so much for your help .<br>S: you are welcome . is there anything else i can help you with today ?<br>U: no , that s all i need . thank you for your help !<br>S: you are welcome . have a great day . |
| Domain: hotel<br>User: [name]<br>Req: [address]<br>Book: <b>False</b><br><br>Domain: <b>attraction</b><br>User: [area]<br>Req: [address, phone, type]<br>Book: False                                                                                                 | U: hello ! i am looking for information about [hotel.name] . it s a hotel in [value.place] .<br>S: the is a guesthouse in the [value.area] part of town . it is [value.pricerange] -ly priced and has [value.count] stars . would you like me to book a room ?<br><b>U: no , i do not need a reservation . i you .</b><br>S: you are welcome . is there anything else i can help you with today ?<br>U: yes , i am <b>looking for a place called [attraction.name] .</b><br>S: [attraction.name] is a museum in the [value.area] area . it is located at [attraction.address] . their phone number is [attraction.phone] .<br><b>U: i help you with anything else ?</b><br>S: no , that s all i need . thank you .<br>U: you are welcome . have a great day !                                                                                                                                                                                                                                                                                          | U: hello ! i am looking for information about [hotel.name] . it s a hotel in [value.place] .<br>S: [hotel.name] is a guesthouse in the [value.area] . it is [value.pricerange] -ly priced and has [value.count] stars . would you like to book a room ?<br>U: yes , please . i need a room for [value.count] people for [value.count] nights starting on [value.day] .<br>S: i am sorry , but i was unable to book that for you . would you like to try a different day or shorter stay ?<br>U: how about [value.count] nights ?<br><b>S: i was able to book you</b> at the [hotel.name] . your reference number is [hotel.reference] . is there anything else i can help you with ?<br><b>U: i am also looking for a train</b> that leaves after [value.time] on [value.day] .<br>... (Cut Off) → <b>Off the Rails</b>                                                                                                                                                                                                                                                                                               | U: hello ! i am looking for information about [hotel.name] . it s a hotel in [value.place] .<br>S: [hotel.name] is a guesthouse in the [value.area] area . it is a [value.count] star hotel in the [value.area] area . would you like me to book a room for you ?<br><b>U: no , i just need the address</b> and phone number .<br>S: sure , the phone number is [attraction.phone] .<br><b>U: i am also looking for a place to go in town .</b><br>S: there are [value.count] attractions in the [value.area] area . do you have a particular type of attraction in mind ?<br>U: i am not sure . i just need the address and postcode for [value.count] of them .<br>S: [attraction.name] is located at [attraction.address] and the postcode is [attraction.postcode] .<br>U: no , that s all i need . thank you for your help !<br>S: you are welcome . have a great day !                                                                                                                                                                                                                                                    |
| Domain: train<br>User: [day, departure, destination, leaveAt]<br>Req: [duration, price]<br>Book: <b>False</b>                                                                                                                                                        | U: i am looking for a train from [value.place] to [value.place] .<br>S: there are [value.count] trains that meet your criteria . what day and time would you like to travel ?<br>U: i would like to leave on [value.day] after [value.time] .<br>S: i have [value.count] trains that leave [value.place] at [value.time] . would you like me to <b>book it for you ?</b><br><b>U: yes , please . i need the price and travel time please .</b><br>S: the price is [value.price] pounds . the price is [value.price] pounds .<br><b>U: you like me to book that for you ?</b><br>S: no , that s all i need . thank you .<br>U: you are welcome . have a great day !                                                                                                                                                                                                                                                                                                                                                                                     | U: i am looking for a train from [value.place] to [value.place] .<br>S: there are [value.count] trains that meet your criteria . what day and time would you like to travel ?<br>U: i would like to leave on [value.day] and arrive by [value.time] .<br>S: i have train [train.id] that leaves at [value.time] and arrives in [value.place] at [value.time] . would you like me to <b>book that for you ?</b><br><b>U: yes , please . i need [value.count] tickets .</b><br>S: i have booked [value.count] tickets for you . your reference number is [train.reference] .<br>U: i am also looking for a place to stay . i <b>would like a [value.count] star hotel .</b><br>... (Cut Off) → <b>Off the Rails</b>                                                                                                                                                                                                                                                                                                                                                                                                     | U: i am looking for a train from [value.place] to [value.place] .<br>S: what day would you like to travel ?<br>U: i would like to leave on [value.day] .<br>S: there are [value.count] trains that meet your criteria . do you have a time you would like to leave or arrive by ?<br>U: i would like to leave after [value.time] .<br>S: [train.id] leaves at [value.time] and arrives at [value.time] . would you like me to <b>book it for you ?</b><br><b>U: no , i just need the price</b> and the train id .<br>S: the price is [value.price] pounds .<br>U: thank you for your help . that is all i need today .<br>S: you are welcome . have a great day !                                                                                                                                                                                                                                                                                                                                                                                                                                                               |

Table 2: Dialogue qualitative comparison (continue). Req: Requests. U: User, S: System. **Goal hit or miss. Role confusion.**

## B More Generated Responses for Qualitative Comparison

Responses are generated by a model given the goals and all the previous utterances. In Table 3, we present more generated responses for qualita-

tive comparison. We observe that HRED is unable to correctly switch between goal contexts illustrated by the second example.

| Goals                                                                                                                                                                                            | Contexts (Reference)                                                                                                                                                                                                                                                                                                                                                                                                                                                                                                                                                                                                                                                                                                                                                                      | Response                                                                                                                                                                                                                                                                                                                                                    |
|--------------------------------------------------------------------------------------------------------------------------------------------------------------------------------------------------|-------------------------------------------------------------------------------------------------------------------------------------------------------------------------------------------------------------------------------------------------------------------------------------------------------------------------------------------------------------------------------------------------------------------------------------------------------------------------------------------------------------------------------------------------------------------------------------------------------------------------------------------------------------------------------------------------------------------------------------------------------------------------------------------|-------------------------------------------------------------------------------------------------------------------------------------------------------------------------------------------------------------------------------------------------------------------------------------------------------------------------------------------------------------|
| Domain: attraction<br>User: [type]<br>Req: [entrance fee, address, phone]<br>Book: False<br><br>Domain: restaurant<br>User: [pricerange, food]<br>Req: [phone, postcode]<br>Book: False          | U: can you find me a theatre ?<br>S: would you like the [attraction.name] ?<br>U: yes and i need to know the entrance fee , address , and phone number<br>S: the fee is not listed but the address is [attraction.address] and the phone number is [attraction.phone] . can i help you with anything else ?<br>U: i am also looking for a [value.food] restaurant in the [value.pricerange] range .<br>S: i have [value.count] excellent options . [restaurant.name] is in the [value.area] of town , would you like me to reserve you a table ?<br>U: i am not sure how many people will be coming , so i will do that later. but can you provide me with their postcode and phone number ?                                                                                              | <b>LM+G:</b> the phone number is [restaurant.phone] and the postcode is [restaurant.postcode] .<br><b>HRED:</b> the phone number is [restaurant.phone] and the postcode is [restaurant.postcode] .<br><b>G-DuHA:</b> sure , the phone number is [restaurant.phone] and the postcode is [restaurant.postcode] . is there anything else i can help you with ? |
| Domain: train<br>User: [day, departure, destination, leaveAt]<br>Req: []<br>Book: True<br><br>Domain: attraction<br>User: [area, type]<br>Req: [phone, postcode]<br>Book: False                  | U: i am looking for a train that leaves on [value.day] going to [value.place] .<br>S: there are [value.count] trains that meet what you are asking . where would you like to depart from ?<br>U: [value.place] , it should also leave after [value.time] .<br>S: [train.id] departs [value.place] at [value.time] and arrives in [value.place] at [value.time] . will that work ?<br>U: yes it will . can you book that for just me , and provide the reference number ?<br>S: sure thing ! how many tickets do you need ?<br>U: i need [value.count] ticket and can i please have the reference number ?<br>S: booking was successful , the total fee is [value.price] gbp payable at the station . reference number is [train.reference] . can i provide any further help today ?       | <b>LM+G:</b> i am also looking for a place to go in the [value.area] .<br><b>HRED:</b> i am also looking for a place to stay . i would like a hotel in the [value.area] .<br><b>G-DuHA:</b> i am also looking for a place to go in town .                                                                                                                   |
| Domain: hotel<br>User: [area, internet, parking, stars]<br>Req: [postcode, pricerange, type]<br>Book: False<br><br>Domain: restaurant<br>User: [area, food, pricerange]<br>Req: []<br>Book: True | U: hi i am looking for a restaurant in the [value.area] of town serving [value.food] food .<br>S: that s great ! there are several [value.food] restaurant -s near the city [value.area] . are you looking for a budget @UNK option or are you comfortable with a more [value.pricerange] place ?<br>U: a [value.pricerange] option please .<br>S: we have [restaurant.name] , the ghandi and [restaurant.name] , do you want me to book you for [value.count] of those ?<br>U: yes please for [value.count] people at [value.time] on [value.day].<br>S: you are all set . they will hold the table for [value.count] minutes and your reference number is [hotel.reference]<br>U: thank you , appreciate your service .<br>S: no problem . is there anything else i can help you with ? | <b>LM+G:</b> i am also looking for a place to stay . i would like a [value.count] star hotel in the [value.area] .<br><b>HRED:</b> no , that s all . thank you .<br><b>G-DuHA:</b> i am also looking for a place to stay .                                                                                                                                  |
| Domain: taxi<br>User: [destination, arriveBy, departure]<br>Req: [car type, phone]<br>Book: False                                                                                                | U: i need to book a tax departing from gandhi .<br>S: what is your destination and when would you like to depart ?                                                                                                                                                                                                                                                                                                                                                                                                                                                                                                                                                                                                                                                                        | <b>LM+G:</b> i need to arrive by [value.time] .<br><b>HRED:</b> i am going to [value.place] from [value.place] .<br><b>G-DuHA:</b> i want to go to [value.place] and get to [restaurant.name] by [value.time] .                                                                                                                                             |
| Domain: attraction<br>User: [area]<br>Req: [address]<br>Book: False<br><br>Domain: hotel<br>User: [pricerange, internet, stars]<br>Req: []<br>Book: True                                         | U: hello , i am looking for place -s to go in the [value.area] .<br>S: there are many attractions in the [value.area] like museums , architecture , boating , and @UNK . what are you interested in ?<br>U: how about a boating attraction ?<br>S: there are [value.count] in the [value.area] of town . [hotel.name] , and [hotel.name] . would either of those interest you ?<br>U: could you give me the address for [attraction.name] , please ? i also need a place to stay , preferably somewhere [value.pricerange] .<br>S: sure , [attraction.name] is @UNK at [attraction.address] . the [hotel.name] is in the [value.pricerange] price range with [value.count] stars . would you like to book a room ?<br>U: does it offer free wifi internet ?                               | <b>LM+G:</b> yes , it does . would you like me to book a room for you ?<br><b>HRED:</b> yes , it does have free parking .<br><b>G-DuHA:</b> yes , it does .                                                                                                                                                                                                 |

Table 3: Qualitative comparison of generated responses. Req: Requests. U: User, S: System.
